# Supplementary material
Source: MDPI journal article supplement (https://www.mdpi.com/2073-4352/13/2/328)
Supplement: s1 [file s1 › crystals-2200508-supplementary.pdf]

# The Effect of Deformation Temperature on the Deformation Mechanism of A Medium-Mn Advanced High-Strength Steel (AHSS)

Po C. Chen, Tzu T. Peng, Yu C. Chan, Jun M. Chen and Chih P. Chang \*

Research Center for Physical Properties and Microstructure of Metals,  
Department of Materials and Optoelectronic Science, National Sun Yat-Sen  
University, Kaohsiung 80424, Taiwan

\* Correspondence: cpchang@mail.nsysu.edu.tw

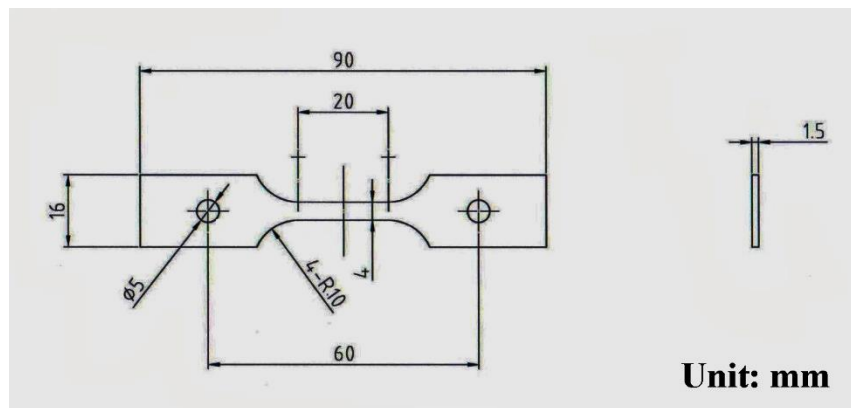

Figure S1. Schematic diagram of tensile test specimen.
